# Supplementary material
Source: PubMed Central journal article supplement (PMC2200913)

**A**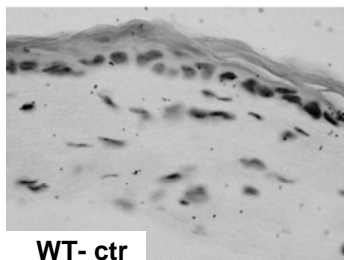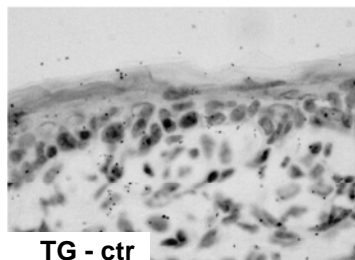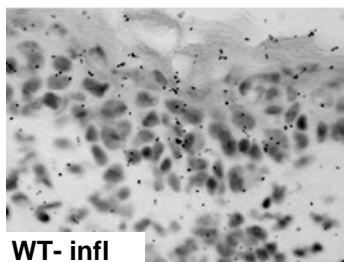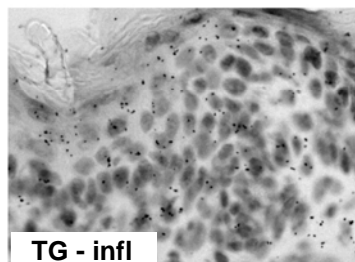**B**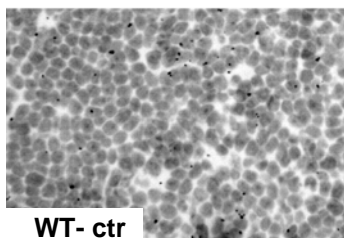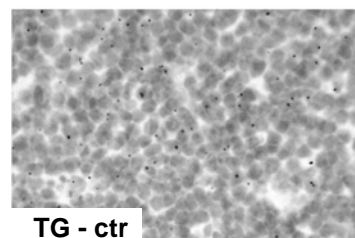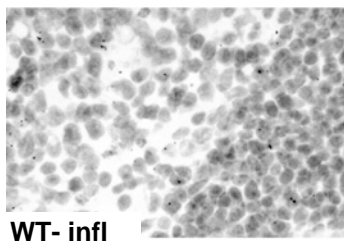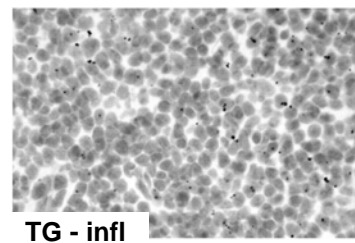

Supplement: blood_blood-2007-01-066811_3.pdf [file blood_blood-2007-01-066811_3.pdf]

**A**

VEGF-A concentration in ears

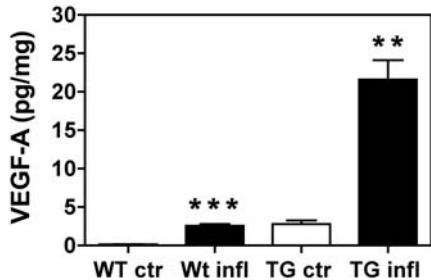**B**

total VEGF-A in auricular LNs

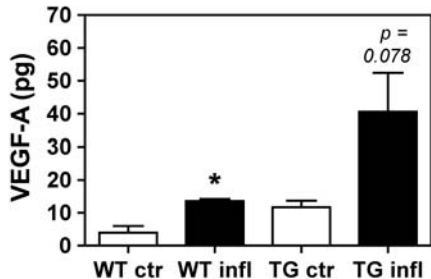

Supplement: blood_blood-2007-01-066811_4.pdf [file blood_blood-2007-01-066811_4.pdf]
